# Supplementary material
Source: Springer Nature journal article supplement (https://www.springermedizin.de/resource/supplementary/13000_2009_246_MOESM2_ESM.pdf/9624168)

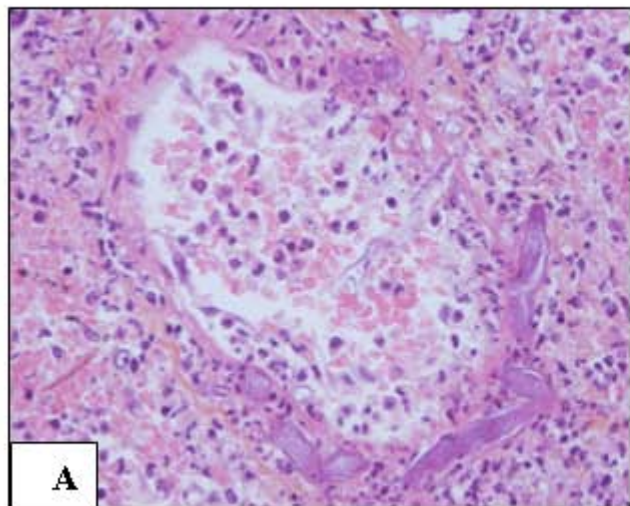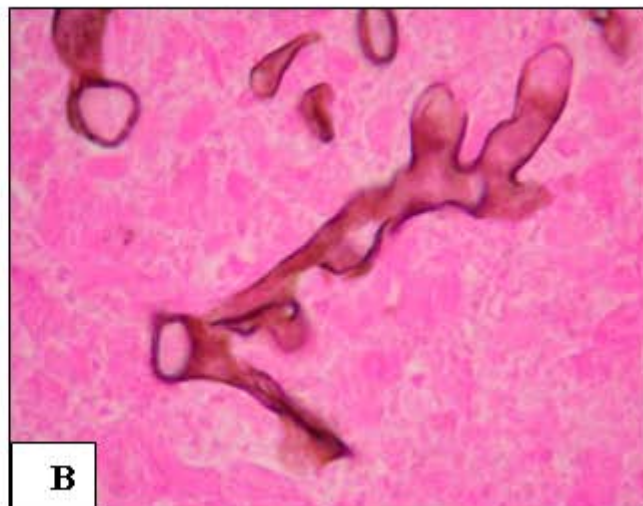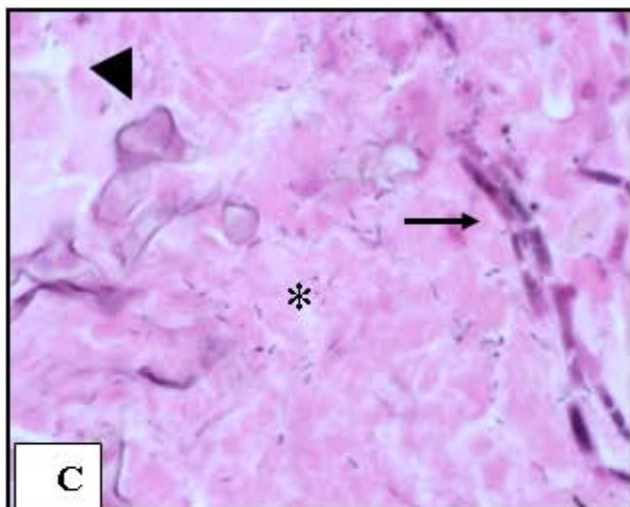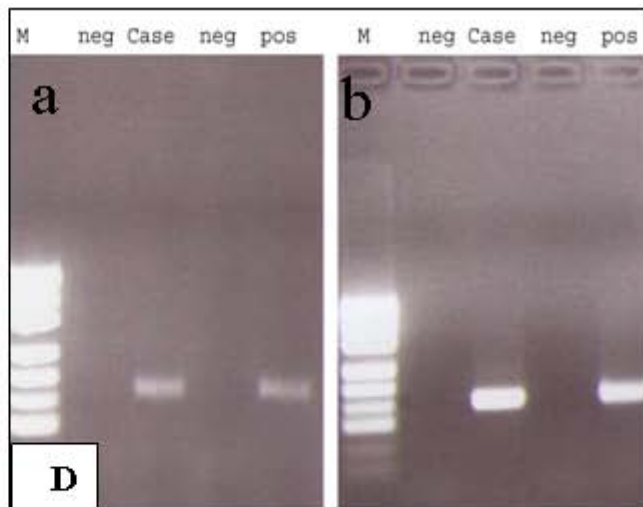

Supplement: MOESM2 [file 9624168]
